# Supplementary material
Source: Elsevier journal article supplement (https://www.sciencedirect.com/science/article/pii/S087025511730447X)
Supplement: mmc2 [file S087025511730447X:mmc2.pdf]

## Questionnaire Health Habits – Pre-test

This questionnaire aims to evaluate health habits. Please respond to the following questions with utmost precision and sincerity. There are no right or wrong answers. In questions with more than one hypothesis of response, place a cross on the one that applies to you. Please answer the questions taking into account your usual health habits BEFORE hospitalization at the Cardiology Service.

The responses are confidential and are only used by the authors for research purposes.

### 1. Have you ever had a heart problem before?

Yes:

No

**Only the previous question was answered in the affirmative**

#### a) At that time you turned to the doctor?

Yes

No

#### b) Followed the recommendations made by the doctor?

Yes

No

### 2. In terms of fat consumption your usual diet is:

Fat free "none"

Poor in fat

"Normal" fats

Rich in fats

### 3. In terms of salt consumption your usual diet is:

Without salt

Very little salt

Seasoned

Salty

### 4. Do you drink coffee?

3 or more coffees per day

2 coffees a day

1 coffee per day

I usually do not drink coffee

### 5. Do you usually drink alcohol?

Every day

Every other day

Rarely

Never

**a) If yes, please indicate which drink (s) you consume at least 3 times per week:**

Mature white wine  
Ripe red wine  
Green wine  
Beer  
Whiskey  
Brandy  
Port wine  
Gin tonic  
Vodka  
Other, indicate which:

**6. Do you smoke?**

Yes  
No

**(a) If yes, please indicate the amount of usual tobacco consumption:**

Less than 10 cigarettes per day  
20 cigarettes per day  
20-40 cigarettes per day  
Over 40 cigarettes per day

**7. What kind of physical activity do you practice?**

I usually do not exercise  
Walk consecutively more than 1h a day  
Swimming  
Gymnasium  
Bike  
Other, indicate which:

**a) Indicate the frequency of your physical activity:**

Everyday  
Every other day  
Once a week

**8. Do you usually measure your blood pressure?**

Weekly  
Monthly  
Every 3 months  
Every 6 months  
Usually do not evaluate blood pressure

**Thank you very much for your cooperation!**

## Questionnaire Health Habits - Post-test and follow-up

This questionnaire aims to evaluate health habits. Please respond to the following questions with utmost precision and sincerity. There are no right or wrong answers. In questions with more than one hypothesis of response, place a cross on the one that applies to you. The responses are confidential and are only used by the authors for research purposes.

### 1. Followed the recommendations made by the doctor?

Yes  
No

### 2. In terms of fat consumption your usual diet is:

Fat free "none"  
Poor in fat  
"Normal" fats  
Rich in fats

### 3. In terms of salt consumption your usual diet is:

Without salt  
Very little salt  
Seasoned  
Salty

### 4. Do you drink coffee?

3 or more coffees per day  
2 coffees a day  
1 coffee per day  
I usually do not drink coffee

### 5. Do you usually drink alcohol?

Every day  
Every other day  
Rarely  
Never

#### a) If yes, please indicate which drink (s) you consume at least 3 times per week:

Mature white wine  
Ripe red wine  
Green wine  
Beer  
Whiskey  
Brandy  
Port wine  
Gin tonic  
Vodka  
Other, indicate which:

### 6. Do you smoke?

Yes

No

**(a) If yes, please indicate the amount of usual tobacco consumption:**

Less than 10 cigarettes per day

20 cigarettes per day

20-40 cigarettes per day

Over 40 cigarettes per day

**7. What kind of physical activity do you practice?**

I usually do not exercise

Walk consecutively more than 1h a day

Swimming

Gymnasium

Bike

Other, indicate which:

**a) Indicate the frequency of your physical activity:**

Everyday

Every other day

Once a week

**8. Do you usually measure your blood pressure?**

Weekly

Monthly

Once every 3 months

Once every 6 months

Usually do not measure blood pressure

**Thank you very much for your cooperation!**
